# Supplementary material
Source: publisher figshare collection journal article supplement (https://tandf.figshare.com/articles/dataset/_/6845087)
Supplement: Supplementary file 1 [file 1]

Archive with 3 entries (3 files):
- gcmb_a_1490954_sm1531.avi
- gcmb_a_1490954_sm1530.pdf
- gcmb_a_1490954_sm1529.avi
