# Supplementary material
Source: publisher figshare collection journal article supplement (https://tandf.figshare.com/articles/dataset/_/6845087)
Supplement: Supplementary file 1 [file 1 › gcmb_a_1490954_sm1530.pdf]

## Continuous metabolic energy model

The model by Umberger et al. [1,2] calculates the energy as a function of the heat rate from the activation of muscles and its maintenance,  $\dot{h}_{AM}$ , the heat rate due to shortening and lengthening of muscles,  $\dot{h}_{SL}$ , and the mechanical work rate,  $w_{CE}$ :

$$\dot{E}(t) = \dot{h}_{AM} + \dot{h}_{SL} + w_{CE} \quad 1$$

The following equation is used to find the activation/maintenance heat rate  $\dot{h}_{AM}$ :

$$\dot{h}_{AM} = (0.4 + 0.6fl_{CE})\dot{\bar{h}}_{AM}A_{AMS} \quad 2$$

Where  $S$  is a factor equal to 1.5 for aerobic conditions [3],  $A_{AM} = A^{0.6}$  is related to the activation and stimulation as described in equation 6 of the paper (see below), and  $fl_{CE}$  and  $\dot{\bar{h}}_{AM}$  are determined as follows:

$$fl_{CE} = \begin{cases} 1 & l_{CE} \leq l_{CE(OPT)} \\ f(l_{CE}) & l_{CE} > l_{CE(OPT)} \end{cases} \quad 3$$

$$\dot{\bar{h}}_{AM} = \begin{cases} 25 & a \leq ST \\ 128FT + 25 & a > ST \end{cases} \quad 4$$

Equation 6 in the paper:

$$A = u + \frac{1}{2} \left( \frac{a - u}{2} + \sqrt{\left( \frac{a - u}{2} \right)^2 + \varepsilon^2} \right)$$

where 128 W/kg and 25 W/kg are constants found using regression,  $f(l_{CE})$  is the location on the force-length relationship of the muscle, and  $FT$  and  $ST$  are the ratios of fast-twitch and slow-twitch fibers in the muscle, respectively,  $l_{CE(OPT)}$  is the optimal fiber length, and  $l_{CE}$  is the current fiber length.

When the fiber length is longer than optimal,  $\dot{h}_{AM}$  is split up into two parts, where 40% represents the activation heat rate and 60% the activation heat rate, which is dependent on the location on the force-length relationship [4]. This does not create a discontinuity in the equation, since the derivative of  $f(l_{CE})$  is zero when the fiber length is optimal. Also, equation 4 is continuous since  $\dot{\bar{h}}_{AM}$  is a constant.

The shortening-lengthening heat rate is calculated as follows:

$$\dot{h}_{SL} = A_{SL}\dot{\bar{h}}_{SL}fl_{CE}S \quad 5$$

Where  $A_{SL}$  is equal to  $A^2$ , and  $\dot{\bar{h}}_{SL}$  is determined as follows:

$$\dot{\bar{h}}_{SL} = \alpha_L \bar{v}_{CE(l)} - \alpha_{FT} \bar{v}_{CE(s)} FT + \begin{cases} 100 & \alpha_{ST} \bar{v}_{CE(max)_{ST}} < -\alpha_{ST} \bar{v}_{CE(s)} ST \\ -\alpha_{ST} \bar{v}_{CE(s)} ST & \alpha_{ST} \bar{v}_{CE(max)_{ST}} > -\alpha_{ST} \bar{v}_{CE(s)} ST \end{cases} \quad 6$$

Where  $\bar{v}_{CE(l)}$  and  $\bar{v}_{CE(s)}$  are the shortening and lengthening velocities normalized to optimal fiber length, respectively.  $\bar{v}_{CE(max)_{ST}}$  is the normalized maximum shortening velocity for slow-twitch fibers,

4.8 fiber lengths per second.  $\alpha_{ST}$ ,  $\alpha_{FT}$  and  $\alpha_L$  are the shortening heat coefficients for slow-twitch and fast-twitch fibers in J/kg, and the lengthening heat coefficient, respectively:

$$\alpha_{ST} = \frac{100}{\bar{v}_{CE(max)_{ST}}}, \quad \alpha_{FT} = \frac{153}{\bar{v}_{CE(max)_{FT}}}, \quad \alpha_L = 0.3\alpha_{ST}$$

Where  $\bar{v}_{CE(max)_{FT}}$  is the maximum shortening velocity for fast-twitch fibers, assumed to be 12 fiber lengths per second.

The shortening and lengthening velocities are determined as described in the paper:

$$\bar{v}_{CE(l)} = \frac{1}{2} \left( \bar{v}_{CE} + \sqrt{\bar{v}_{CE}^2 + \varepsilon^2} \right) \quad 7$$

$$\bar{v}_{CE(s)} = \frac{1}{2} \left( \bar{v}_{CE} - \sqrt{\bar{v}_{CE}^2 + \varepsilon^2} \right) \quad 8$$

Note that the term  $\alpha_{ST} \bar{v}_{CE(s)} ST$  for  $\dot{h}_{SL}$  cannot exceed 100 W/kg. However, this level is not reached during gait.

The work rate is determined as follows to ensure that it is never negative:

$$w_{CE} = \frac{1}{2} \left( \tilde{w}_{CE} + \sqrt{\tilde{w}_{CE}^2 + \varepsilon^2} \right) \quad 9$$

where

$$\tilde{w}_{CE} = -\frac{F_{CE} v_{CE}}{m_{mus}} \quad 10$$

Where  $m_{mus}$  is the muscle mass,  $F_{CE}$  is the force in the contractile element, and  $v_{CE}$  is the fiber velocity, negative when shortening.  $\varepsilon$  is a small number, used to decrease the nonlinearity of the problem. For simplicity, the same value for  $\varepsilon$  is used for the shortening/lengthening velocity and the work rate.

The muscle mass is determined as follows:

$$m_{mus} = \frac{F_{max} \rho}{\sigma} l_{CE(OPT)} \quad 11$$

Where  $F_{max}$  is the maximum isometric force,  $\sigma$  is the maximum muscle stress, 250 kPa,  $\rho$  is the muscle density, 1059.7 kg/m<sup>3</sup>, and  $l_{CE(OPT)}$  is the optimal fiber length.

## Predictive gait simulation

The following objective was used with direct collocation using  $N$  collocation nodes:

$$J(x, u) = \frac{1}{vM} \sum_{j=1}^{16} \frac{1}{N} \sum_{i=1}^N \dot{E}(x(i), u(i), \varepsilon) m_{mus}(j) + \frac{W_{Reg}N}{N_{st} + N_{con}} \sum_{i=1}^N \left( \sum_{s=1}^{N_{st}} (x_s(i+1) - x_s(i))^2 + \sum_{c=1}^{N_{con}} (u_c(i+1) - u_c(i))^2 \right) \quad 12$$

Where  $W_{Reg}$  is the weight of the regularization term,  $N_{st}$  is the number of states, and  $N_{con}$  is the number of controls. Note that an extra node ( $N + 1$ ) was added for the periodicity constraint.

## Predictive Gait Simulations

Figure 1 shows the five results with the highest objective that were found when minimizing metabolic rate. Figure 2 shows the five results with the highest objective that were found when minimizing effort.

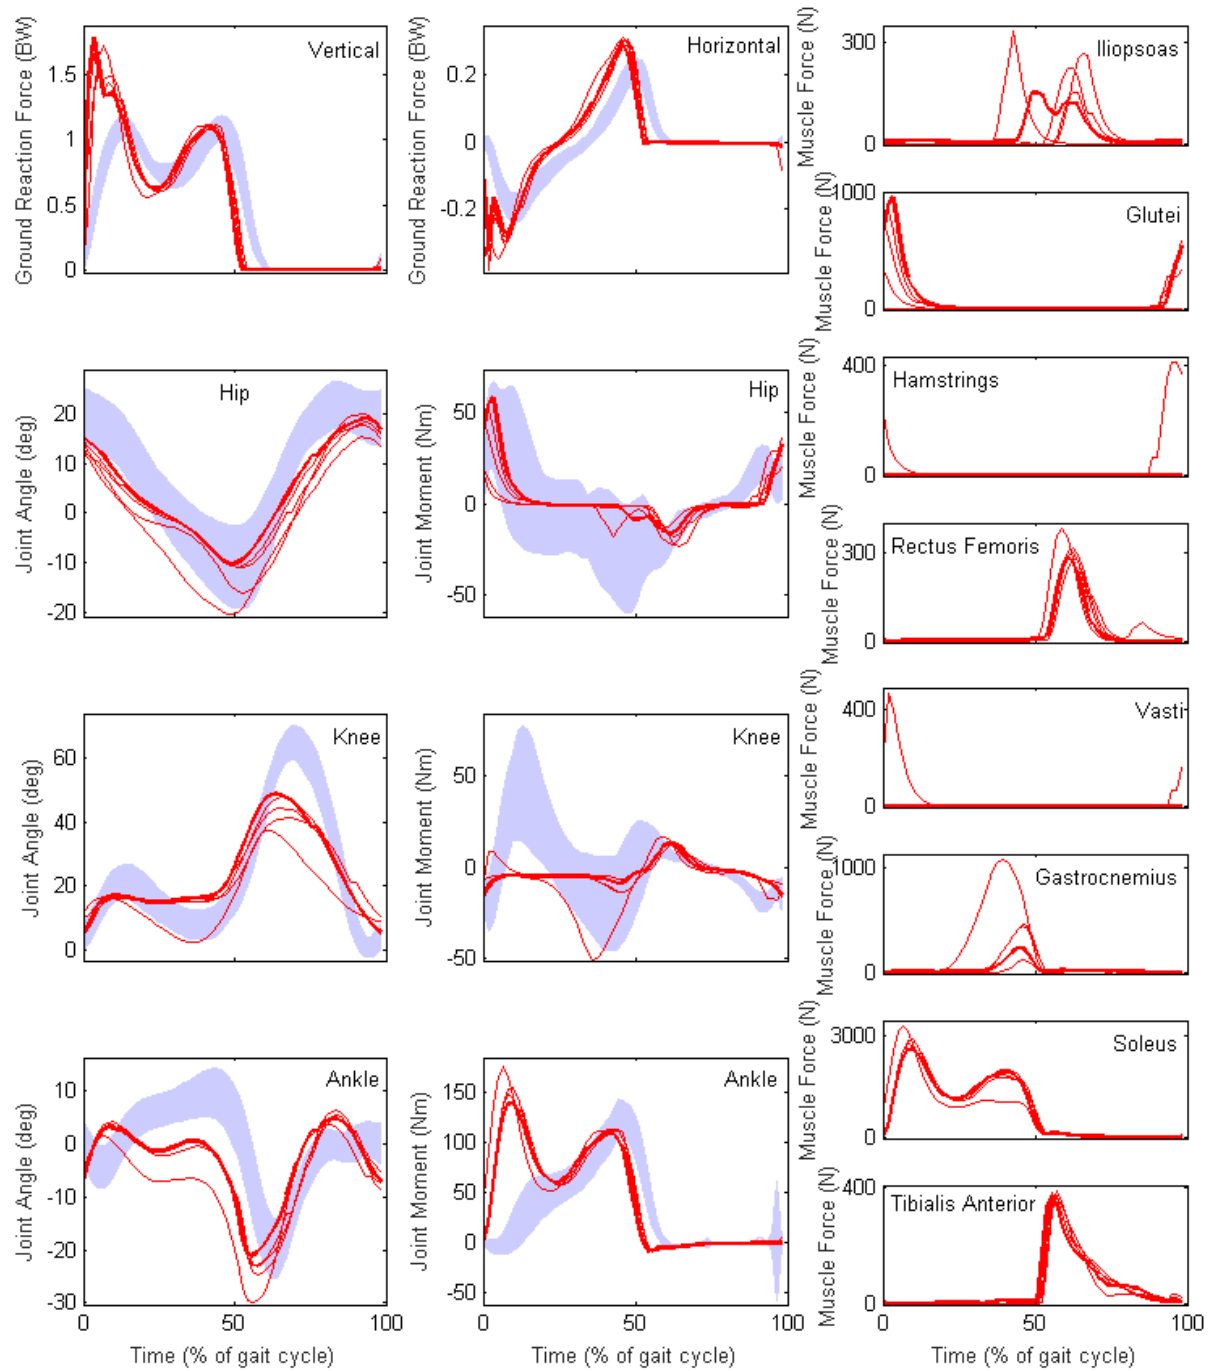

Figure 1 - Ground reaction force, joint angles, moments, and muscle forces of the five solutions with the lowest metabolic rate. The fill shows normal data from Winter [5]

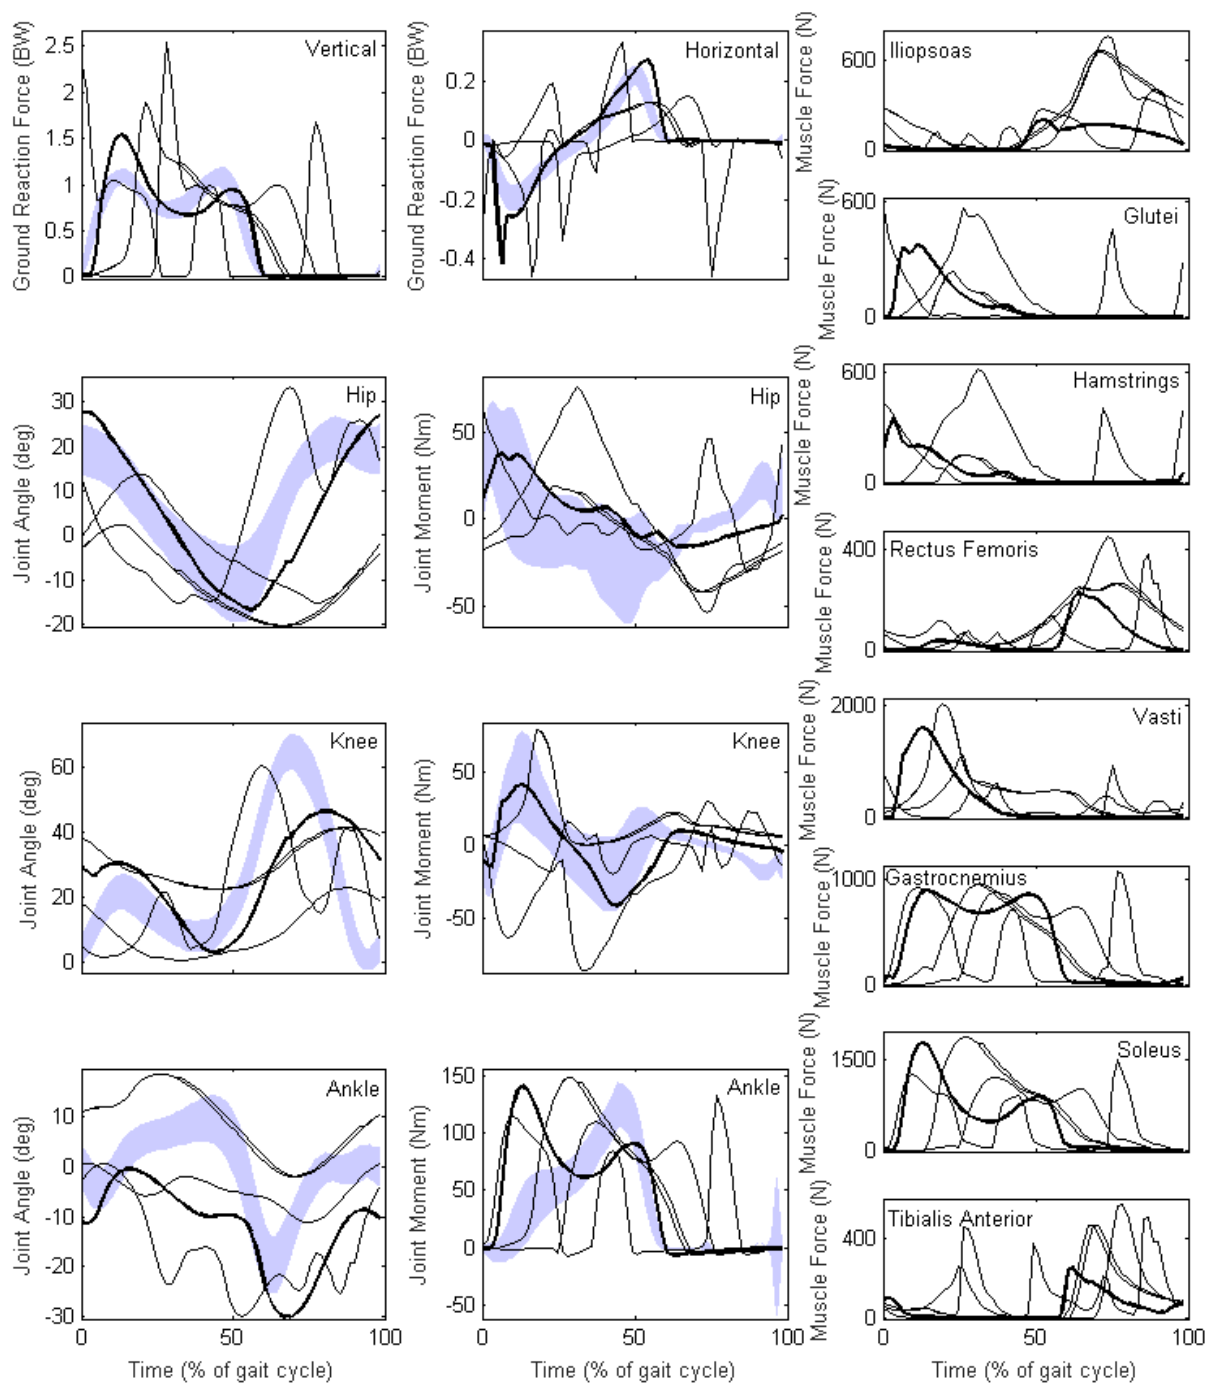

Figure 2 - Ground reaction force, joint angles, moments, and muscle forces of the five solutions with the lowest effort. The fill shows normal data from Winter [5]

## References

- [1] Brian R Umberger, Karin GM Gerritsen, and Philip E Martin. A model of human muscle energy expenditure. *Computer methods in biomechanics and biomedical engineering*, 6(2): 99-111, 2003.

[2] Brian R Umberger. Stance and swing phase costs in human walking. *Journal of the Royal Society Interface*, 7(5): 1329-1340, 2010.

[3] Jose Gonzalez-Alonso, Bjørn Quistorff, Peter Krstrup, Jens Bangsbo, and Bengt Saltin. Heat production in human skeletal muscle at the onset of intense dynamic exercise. *The Journal of physiology*, 524(2): 603-615, 2000.

[4] Earl Homsher and Charles J Kean. Skeletal muscle energetics and metabolism. *Annual Review of Physiology*, 40(1): 93-131, 1978.

[5] David A Winter. *Biomechanics and motor control of human gait: normal, elderly and pathological*. University of Waterloo Press, 1991.
